# Supplementary material
Source: HighWire-hosted journal article supplement (https://bibliotheek.ehb.be/content/bmjsrh-2024-202672)
Supplement: inline-supplementary-material-2 [file inline-supplementary-material-2.pdf]

Table – Surveyed clinicians and their responses

|                                                            | Before introduction of LA spray (N = 13) |    |    |                                                                                                                                                                                                                                                                                                                                                                                                                                                                                                                                        | After introduction of LA spray (N = 13) |   |    |                                                                                                                                                                                                                                                                                    |
|------------------------------------------------------------|------------------------------------------|----|----|----------------------------------------------------------------------------------------------------------------------------------------------------------------------------------------------------------------------------------------------------------------------------------------------------------------------------------------------------------------------------------------------------------------------------------------------------------------------------------------------------------------------------------------|-----------------------------------------|---|----|------------------------------------------------------------------------------------------------------------------------------------------------------------------------------------------------------------------------------------------------------------------------------------|
| Questions                                                  | Responses                                | n  | %  | Comments                                                                                                                                                                                                                                                                                                                                                                                                                                                                                                                               | Responses                               | n | %  | Comments                                                                                                                                                                                                                                                                           |
| Clinical group                                             | Doctor                                   | 9  | 69 |                                                                                                                                                                                                                                                                                                                                                                                                                                                                                                                                        | Doctor                                  | 8 | 62 |                                                                                                                                                                                                                                                                                    |
|                                                            | Nurse                                    | 4  | 31 |                                                                                                                                                                                                                                                                                                                                                                                                                                                                                                                                        | Nurse                                   | 5 | 38 |                                                                                                                                                                                                                                                                                    |
| Fitting experience                                         | >5 years                                 | 9  | 69 |                                                                                                                                                                                                                                                                                                                                                                                                                                                                                                                                        | >5 years                                | 8 | 62 |                                                                                                                                                                                                                                                                                    |
|                                                            | 2-5 years                                | 1  | 8  |                                                                                                                                                                                                                                                                                                                                                                                                                                                                                                                                        | 2-5 years                               | 3 | 23 |                                                                                                                                                                                                                                                                                    |
|                                                            | <2 years                                 | 3  | 23 |                                                                                                                                                                                                                                                                                                                                                                                                                                                                                                                                        | <2 years                                | 2 | 15 |                                                                                                                                                                                                                                                                                    |
| LA options currently confident with offering and providing | topical gel only                         | 0  |    |                                                                                                                                                                                                                                                                                                                                                                                                                                                                                                                                        | topical gel only                        | 0 | 0  |                                                                                                                                                                                                                                                                                    |
|                                                            | injectable only                          | 1  | 8  |                                                                                                                                                                                                                                                                                                                                                                                                                                                                                                                                        | injectable only                         | 0 | 0  |                                                                                                                                                                                                                                                                                    |
|                                                            |                                          |    |    |                                                                                                                                                                                                                                                                                                                                                                                                                                                                                                                                        | spray only                              | 0 | 0  |                                                                                                                                                                                                                                                                                    |
|                                                            | both gel and injectable                  | 9  | 69 |                                                                                                                                                                                                                                                                                                                                                                                                                                                                                                                                        | both gel and injectable                 | 0 | 0  |                                                                                                                                                                                                                                                                                    |
|                                                            |                                          |    |    |                                                                                                                                                                                                                                                                                                                                                                                                                                                                                                                                        | both topical gel and spray              | 5 |    |                                                                                                                                                                                                                                                                                    |
|                                                            |                                          |    |    |                                                                                                                                                                                                                                                                                                                                                                                                                                                                                                                                        | both injectable and spray               | 2 |    |                                                                                                                                                                                                                                                                                    |
| Preferred LA option and why*                               | none                                     | 3  | 23 |                                                                                                                                                                                                                                                                                                                                                                                                                                                                                                                                        | gel, injectable and spray               | 7 |    |                                                                                                                                                                                                                                                                                    |
|                                                            | topical gel                              | 0  |    |                                                                                                                                                                                                                                                                                                                                                                                                                                                                                                                                        | none                                    | 0 |    |                                                                                                                                                                                                                                                                                    |
|                                                            | injectable                               | 10 | 83 |                                                                                                                                                                                                                                                                                                                                                                                                                                                                                                                                        | topical gel                             | 0 |    |                                                                                                                                                                                                                                                                                    |
|                                                            |                                          |    |    | <b>More/most</b> effective [3]<br><b>It's</b> effective and quick acting<br><b>More</b> effective than topical gel<br><b>It</b> provides anaesthetic effect required<br><b>Remains</b> local, not as messy<br><b>Never</b> been taught [to perform IUC insertions] with [topical] gel, unsure how effective it is<br><b>More</b> experience and evidence base for its use [x2]<br><b>I had</b> a patient who had a vasovagal episode with [topical] gel - no episodes with injectable and [injectable] is good if cervical os is small | injectable                              | 3 | 23 | <b>I think</b> it is the most effective, achieves best pain relief<br>[ <b>I</b> ] <b>Usually</b> fit more difficult ones in gynae that require dilation or pipelles, so would feel this more appropriate in these circumstances<br>[It is the] <b>One</b> I am most familiar with |

|                                                                                                            |                      |   |    |                                                                                                                                                                                                                                                                                                                                                                                                                                                                                                                                                                                                   |                      |    |    |                                                                                                                                                                                                                                                                                                                                                                                                                                                                                                                      |
|------------------------------------------------------------------------------------------------------------|----------------------|---|----|---------------------------------------------------------------------------------------------------------------------------------------------------------------------------------------------------------------------------------------------------------------------------------------------------------------------------------------------------------------------------------------------------------------------------------------------------------------------------------------------------------------------------------------------------------------------------------------------------|----------------------|----|----|----------------------------------------------------------------------------------------------------------------------------------------------------------------------------------------------------------------------------------------------------------------------------------------------------------------------------------------------------------------------------------------------------------------------------------------------------------------------------------------------------------------------|
|                                                                                                            |                      |   |    |                                                                                                                                                                                                                                                                                                                                                                                                                                                                                                                                                                                                   | spray                | 8  | 62 | <b>Easy</b> to use [x6]<br><b>Appears</b> to ... works well [x3]<br><b>Ease</b> of use, quick..., patients tolerate well, no sharp sensation for patient<br>Its quick [x2]<br><b>Easy</b> to use, quick acting, cheapest option and environmentally friendly!<br><b>Patients</b> seem to prefer the idea of a spray to injectable as it is a less invasive procedure than inserting a needle<br><b>It</b> works very well if you wait 3-4mins, especially if you can get the nozzle in the [cervical] os for 2 pumps |
|                                                                                                            | none                 | 2 | 17 | <b>I do</b> not use any [LA]<br><b>Don't</b> know the efficacy of either [topical gel or injectable LA]                                                                                                                                                                                                                                                                                                                                                                                                                                                                                           | none                 | 2  | 15 | <b>I ... advise</b> to take analgesia 1 hour before appointment; sometimes just talking them through the procedure as you're doing it is enough...<br><b>Patient choice</b>                                                                                                                                                                                                                                                                                                                                          |
| <b>Do you think having an LA spray pain relief option in the service for coil fittings will be useful?</b> | yes                  | 8 | 62 | <b>LA spray</b> is easier to administer, and does not bleed like injectable, and quick acting compared to gel<br><b>I think</b> it is useful for patients to be given increased choice/options for pain relief during IUC insertion but would like to see more evidence for its efficacy<br><b>Spray</b> has advantage of being quick and pain free so I think I would offer it more and would make patients feel less anxious<br><b>Don't</b> tend to use much anyway - patients seem to tolerate [IUC insertions] without [LA] or don't like idea of extra injection (risk of extra discomfort) | yes                  | 12 | 92 | <b>Allows</b> patients to have LA when having devices fitted by clinicians who aren't comfortable or trained with giving cervical blocks, allows pts to have LA who might fear the idea of a needle<br><b>I just</b> routinely use it now on all pts unless they specifically object.<br>Excellent work on getting it in our pharmacy!                                                                                                                                                                               |
|                                                                                                            | may be' or 'depends' | 5 | 38 | <b>No</b> one has explained the benefits of LA spray as well as disadvantages                                                                                                                                                                                                                                                                                                                                                                                                                                                                                                                     | may be' or 'depends' | 1  | 8  | <b>I offer</b> LA to all but feel it is not required for most patients                                                                                                                                                                                                                                                                                                                                                                                                                                               |
|                                                                                                            | no                   | 0 | 0  |                                                                                                                                                                                                                                                                                                                                                                                                                                                                                                                                                                                                   | no                   | 0  | 0  |                                                                                                                                                                                                                                                                                                                                                                                                                                                                                                                      |

LA – local anaesthesia. Percentages rounded up to the nearest whole. \*One participant did not answer this question before the introduction of LA spray.
